# Supplementary material for: Sequence-dependent trafficking and activity of GDE2, a GPI-specific phospholipase promoting neuronal differentiation
Source: PubMed Central journal article supplement (PMC7033719; doi:10.1242/jcs.235044), 2020-02-10
Supplement: joces-133-235044-s1.pdf [file joces-133-235044-s1.pdf]

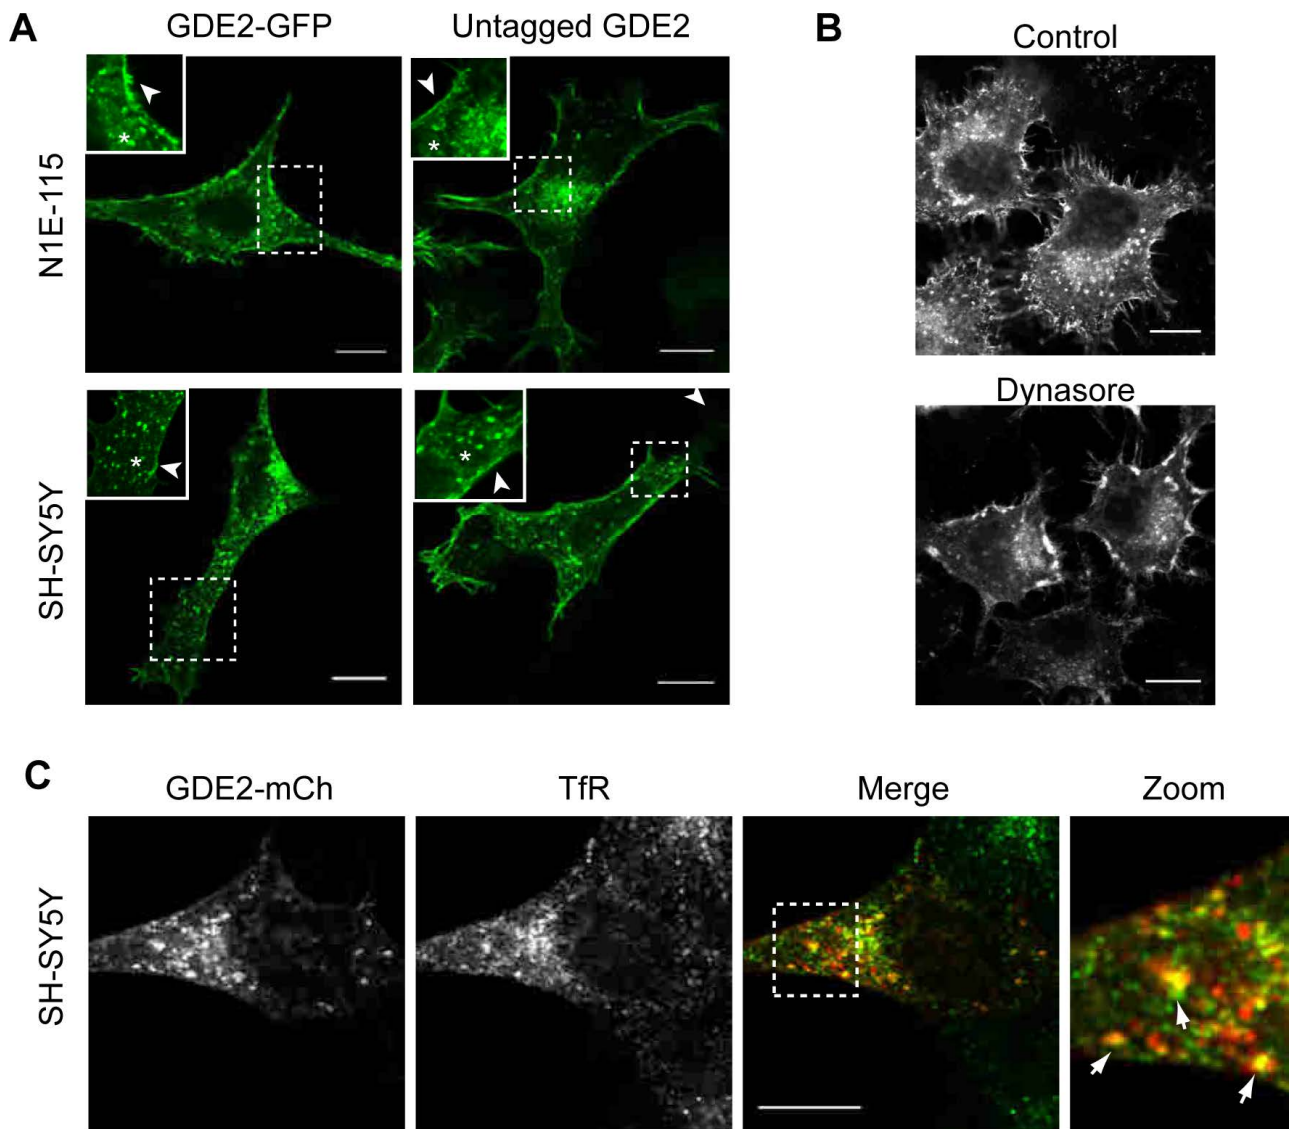

**Figure S1. GDE2 subcellular localization and endocytic routes.**

**A.** Confocal images showing GDE2-GFP and untagged GDE2 localization in membrane microdomains and intracellular vesicles in N1E-115 and SH-SY5Y cells. White arrows point to microdomains at the plasma membrane and asterisk to intracellular vesicles. Bar, 10  $\mu$ m.

**B.** GDE2 accumulates at the cell surface with loss of GDE2-positive vesicles in N1E-115 cells treated with the dynamin inhibitor Dynasore (80  $\mu$ M). Bar, 10  $\mu$ m.

**C.** GDE2 co-localizes with endogenous transferrin receptor. SH-SY5Y cells were transiently transfected with GDE2-mCherry, fixed, and endogenous transferrin receptor (TfR) detected with an anti-TfR antibody. The zoom panel shows a magnified view of the area outline by the dashed square. White arrows point to GDE2- and TfR-positive vesicles. Bar 10  $\mu$ m.

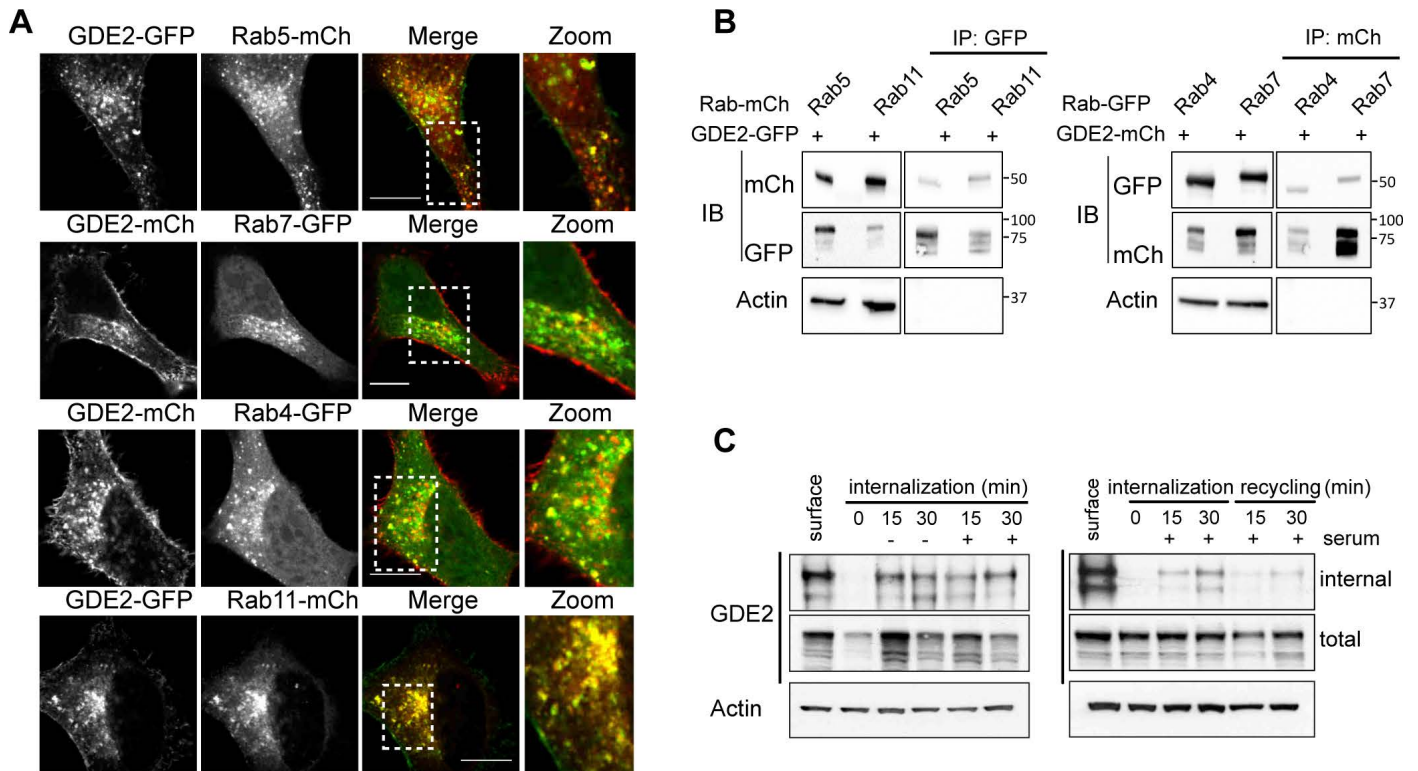

**Figure S2. GDE2 colocalizes with Rab GTPases.**

**A.** GDE2 co-localization with the indicated Rab GTPases in N1E-115 cells. Bar, 10  $\mu$ m.

**B.** GDE2 (fused to GFP or mCh) associates with the indicated Rab GTPases in HEK293T cells. GDE2 was immunoprecipitated (IP) and subjected to immunoblotting (IB) using either anti-GFP or anti-mCherry antibody.

**C.** N1E-115 cells expressing GDE2-mCh were surface-labelled with NHS-S-S-Biotin. Internalization proceeded for 15 and 30 min at 37°C in presence or absence of 10% FBS. Surface biotin was reduced with MesNa at 4°C, and the cells were shifted to 37°C for the indicated time periods to trigger recycling of the internal pool. The amount of internalized and total biotin-labelled GDE2 determined by immunoblotting using anti-mCh antibody. Actin was used as loading control.

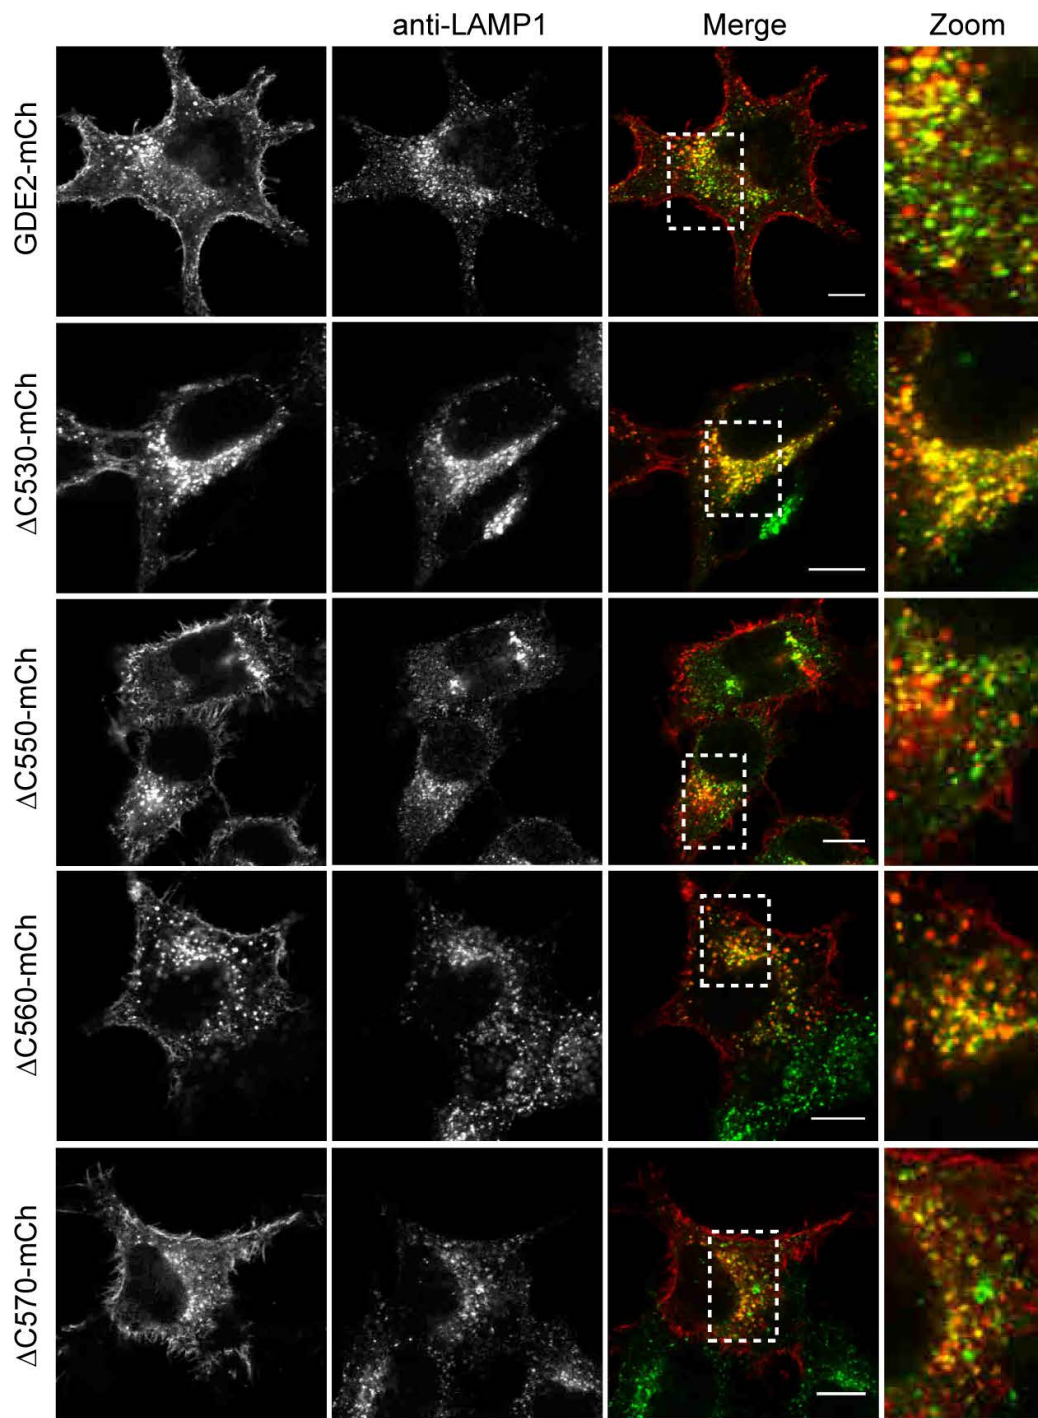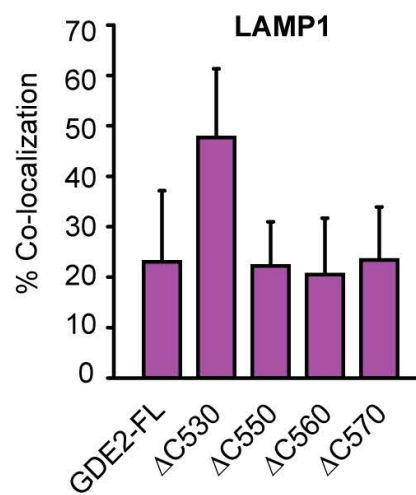

**Figure S3. Lysosomal localization of GDE2 and its truncation mutants.**

N1E-115 cells expressing the indicated GDE2-mCh constructs were immunostained for LAMP1, using LAMP1-specific antibody. Bar, 10  $\mu\text{m}$ . Lower panel, quantification of GDE2-LAMP1 co-localization. Data represent the median  $\pm$  SEM (error bars) of co-localization.

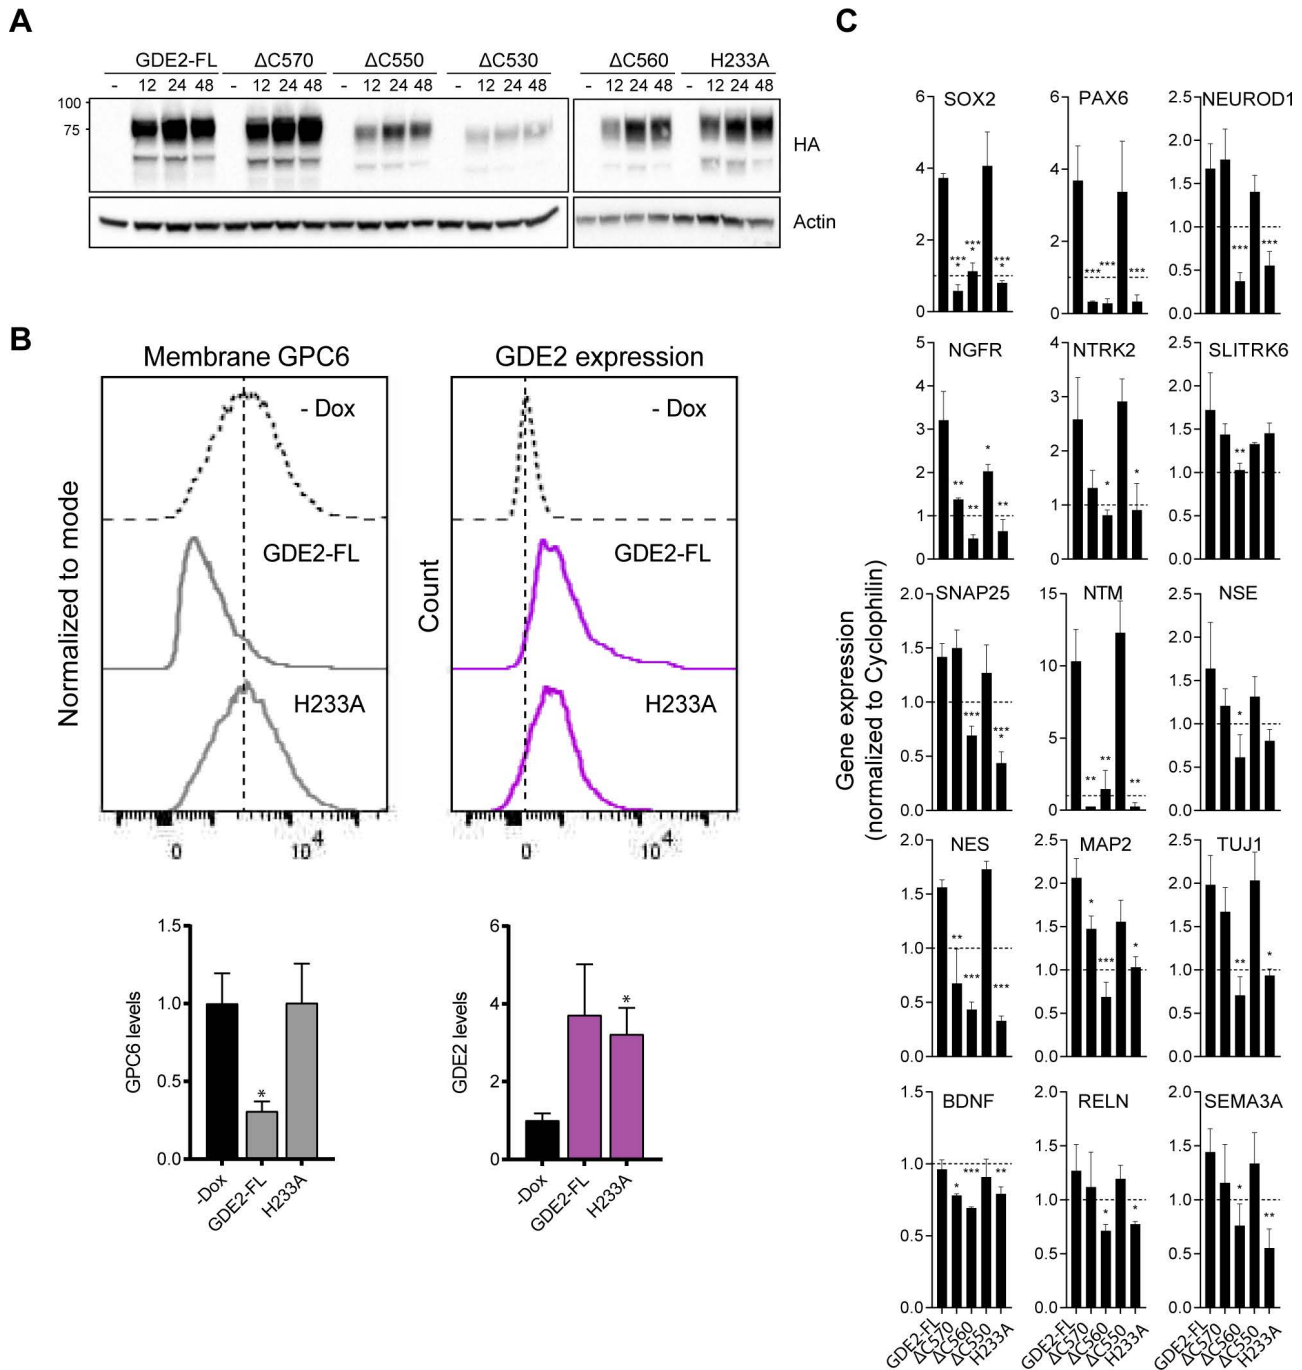

**Figure S4. Expression and localization of GDE2 and truncation mutants in Dox-treated SH-SY5Y cells.**

**A.** Western blots showing expression of the indicated GDE2-HA constructs after 24 and 48 hrs of Dox treatment. Actin was used as loading control. See also **Fig. 3A**.

**B.** Control experiment showing that GDE2(H233A) at the cell surface is inactive towards GPC6. Cell surface expressions were determined by FACS. Data show the median  $\pm$  SEM (error bars) from triplicate measurements taken from two independent experiments. \* $p < 0.05$ , paired t test. See also **Fig. 3C**.

**C.** Induction of neuronal differentiation genes upon Doxycycline induction (48 hrs) of the indicated GDE2 constructs, as determined by qPCR. Data represent the average value of triplicate biological measures  $\pm$  SEM (error bars). \* $p < 0.05$ , \*\* $p < 0.01$ , \*\*\* $p < 0.001$ , \*\*\*\* $p < 0.0001$  by unpaired t test. See also **Fig. 3D**.

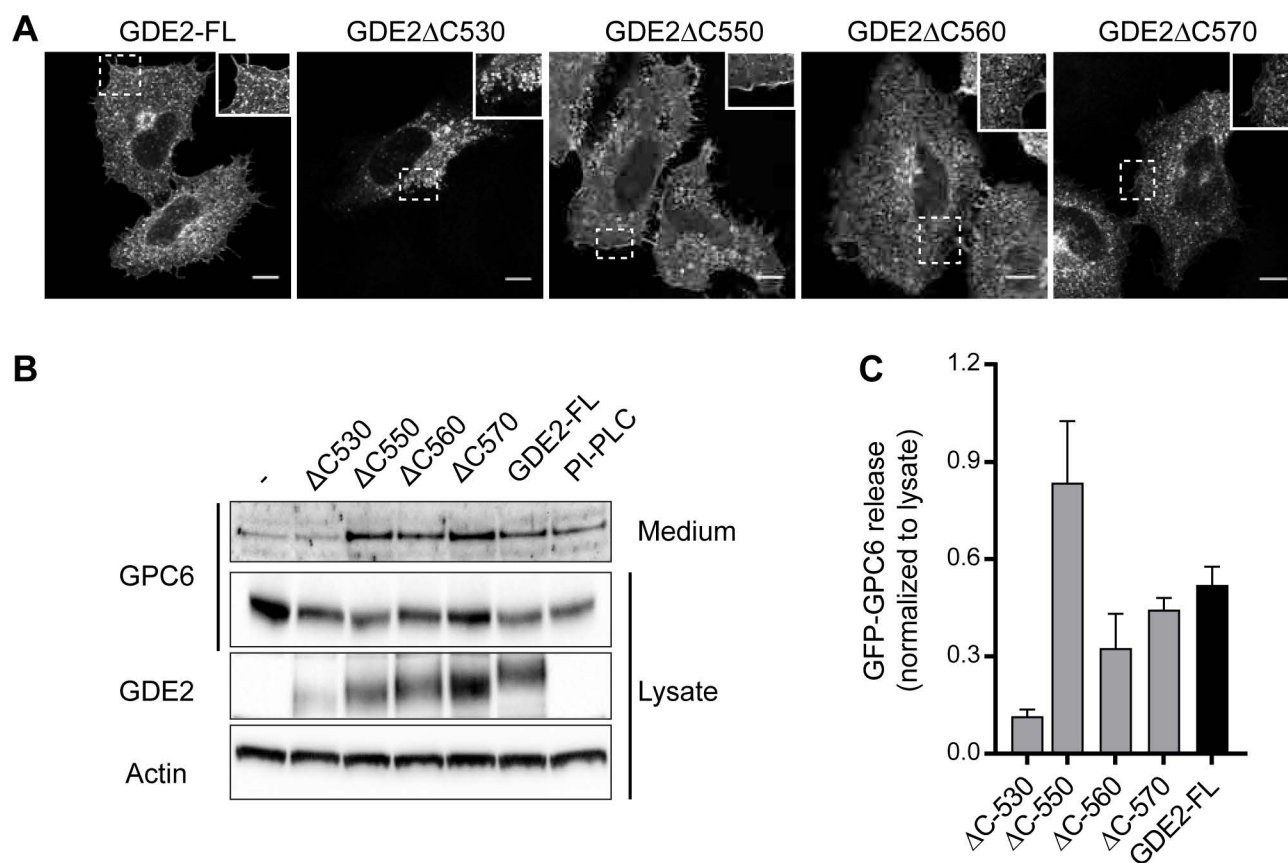

**Figure S5. GDE2-induced GPC6 shedding in HeLa cells.**

**A.** Localization of GDE2-HA and its truncation mutants in HeLa cells. Subcellular localizations were similar to those in neuronal cells. Bar, 10  $\mu$ m.

**B.** HeLa cells were co-transfected with GFP-GPC6 and GDE2-HA. After 24 hrs, cells were serum-starved and GPC6 was allowed to accumulate in the medium. Bacterial PI-PLC was used as control.

**C.** Quantitated bands of released GPC6 normalized to its total expression in the cell lysate.

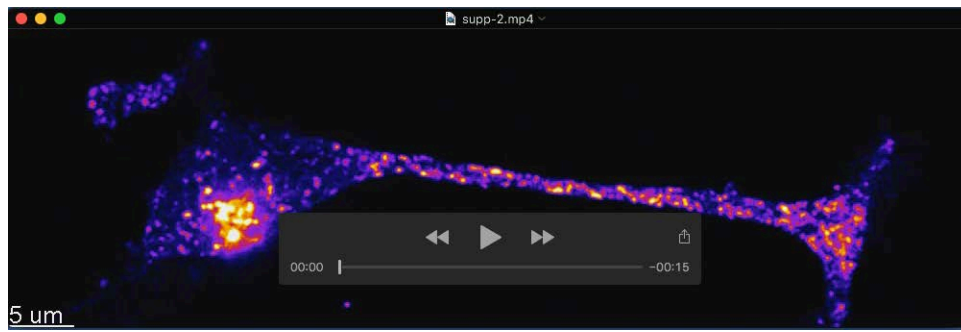

**Movie 1. Live-imaging of GDE2 intracellular trafficking in SH-SY5Y cells.**

A single cell expressing eGFP-tagged GDE2 was imaged on a Leica SP8 confocal microscope using a 63x oil immersion objective at ~8 frames per min. Note the rapid motility of vesicular GDE2 and its bi-directional movement towards and from the neurite ending. Scale bar and timing as indicated. Image size, 81 x 33  $\mu\text{m}$ .

**Table S1. Primers used for qPCR**

| <b>Gene</b> | <b>Forward primer 5'-3'</b> | <b>Reverse primer 5'-3'</b> |
|-------------|-----------------------------|-----------------------------|
| BDNF        | TGGCTGACACTTTTGAACAC        | GGACCCTCATGGACATGTTT        |
| Cyclophilin | CATCTGCACTGCCAAGACTGA       | TTGCCAAACACCACATGCTT        |
| MAP2        | CCAATGGATTCCCATACAGG        | TCCTTGCAGACACCTCCTCT        |
| NES         | AGGTGGCCACGTACAGGAC         | TCTCAAGGGTAGCAGGCAAG        |
| NEUROD1     | CCGACAGAGCCCAGATGTAGTTCTT   | GCCCCAGGGTTATGAGACTATCACT   |
| NGFR        | GGCCTCGTGTTCTCCTG           | CAGGGATCTCCTCGCACTC         |
| NSE         | CTGATGCTGGAGTTGGATGG        | CCATTGATCACGTTGAAGGC        |
| NTM         | GTCTCTCAGGCTGCTGTTCC        | ATCCAGGCACCACTTGTGCAT       |
| NTRK2       | CGAATCTCCAACCTCAGACC        | CCCCATTGTTTATGTGAGTG        |
| PAX6        | CAGCTCGGTGGTGTCTTTGT        | ACTTGAAGTGGAACTGACAC        |
| RELN        | CCACAGGCCTTAATAACAACAG      | GGGTCTGAATAACTAAAGCGACATGA  |
| SEMA3A      | TTGTCTGTCTTTTCTGGGGAGT      | TGTGATCCTTTGCTCCAACA        |
| SLITRK6     | AATAACCCATCCATGCCAAC        | AACCACTATCCCTGCAGCAC        |
| SNAP25      | AGTTGGCTGATGAGTCGCTG        | TGAAAAGGCCACAGCATTTC        |
| SOX2        | ATGGGTTTCGGTGGTCAAGT        | GGTAGTGCTGGGACATGTGA        |
| TUJ1        | CCTGGAACCCGGAACCAT          | AGGCCTGAAGAGATGTCCAAAG      |
